# Supplementary material for: Network Proteomics of the Lewy Body Dementia Brain Reveals Presynaptic Signatures Distinct from Alzheimer’s Disease
Source: PubMed Central journal article supplement — bioRxiv. 2024 Jan 24:2024.01.23.576728. Preprint. [Version 1] doi: 10.1101/2024.01.23.576728 (PMC10849701; doi:10.1101/2024.01.23.576728), 2024-01-24

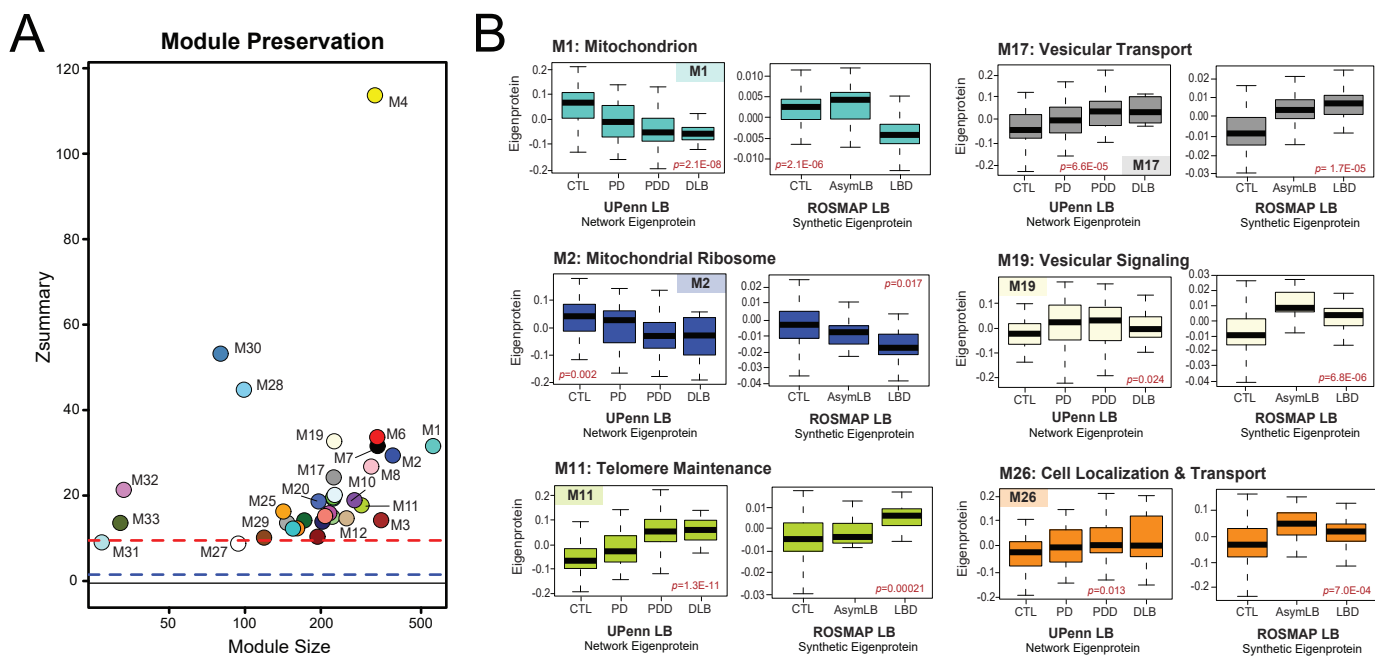

Supplement: media-1.pdf [file media-1.pdf]
